# Supplementary material for: Associations of Cigarette Smoking With Subclinical Inflammation and Atherosclerosis: ELSA‐Brasil (The Brazilian Longitudinal Study of Adult Health)
Source: PubMed Central journal article supplement — J Am Heart Assoc. 2017 Jun 24;6(6):e005088. doi: 10.1161/JAHA.116.005088 (PMC5669156; doi:10.1161/jaha.116.005088), 2017-06-24
Supplement: JAH3-6-e005088-s001.pdf [file JAH3-6-e005088-s001.pdf]

# **SUPPLEMENTAL MATERIAL**

**Table S1. Odds ratios with 95% CI for the levels of biomarkers of cardiovascular injury (hsCRP  $\geq$  vs.  $<$  2 mg/L) by smoking status, burden, years since quitting and intensity**

|                                                                                  | hsCRP $\geq$ 2 mg/L |           | hsCRP $<$ 2 mg/L    |           |
|----------------------------------------------------------------------------------|---------------------|-----------|---------------------|-----------|
|                                                                                  | OR<br>(95% CI)      | P-value   | OR<br>(95% CI)      | P-value   |
| <b>Smoking status</b>                                                            | N=14,000            |           | N=13,815            |           |
| Never                                                                            | REF                 |           | REF                 |           |
| Former                                                                           | 1.16 (1.07 – 1.25)  | $<$ 0.001 | 1.03 (0.95 – 1.13)  | 0.44      |
| Current                                                                          | 1.51 (1.36 – 1.68)  | $<$ 0.001 | 1.70 (1.51 – 1.91)  | $<$ 0.001 |
| <b>Pack-years of smoking (per 5 pack-years increase)</b>                         | N=5,854/4,039/1,815 |           | N=5,769/3,987/1,782 |           |
| Ever smokers                                                                     | 1.05 (1.04 – 1.07)  | $<$ 0.001 | 1.04 (1.03 – 1.06)  | $<$ 0.001 |
| Former smokers                                                                   | 1.05 (1.03 – 1.07)  | $<$ 0.001 | 1.03 (1.01 – 1.05)  | 0.007     |
| Current smokers                                                                  | 1.04 (1.01 – 1.07)  | 0.005     | 1.05 (1.02 – 1.08)  | 0.001     |
| <b>Years since quitting smoking (5 years increase) among former smokers only</b> | N=4,048             |           | N=3,994             |           |
|                                                                                  | 0.93 (0.90 – 0.96)  | $<$ 0.001 | 0.95 (0.91 – 0.98)  | $<$ 0.01  |
| <b>Smoking intensity (10 cigarettes/day) among current smokers</b>               | N=1,815             |           | N=1,782             |           |
|                                                                                  | 1.15 (1.04 – 1.28)  | 0.007     | 1.17 (1.04 – 1.30)  | 0.006     |

hsCRP indicates high-sensitivity C-reactive protein.

Bold items are statistically significant interaction terms ( $P < 0.05$ ).

**Table S2. Beta-coefficients/odds ratios and interaction P-values for age, sex, race and education in Model 2 by smoking status, burden, years since quitting and intensity**

|                                         | Age<br>(continuous)     | Sex (binary)<br>Females vs.<br>males | Race (continuous<br>ordinal)<br>White, Brown,<br>Black, Asian | Education (continuous<br>ordinal)<br>Less than elementary,<br>elementary, high<br>school, college |
|-----------------------------------------|-------------------------|--------------------------------------|---------------------------------------------------------------|---------------------------------------------------------------------------------------------------|
| <b>Ln hsCRP</b>                         |                         |                                      |                                                               |                                                                                                   |
| Former                                  | <b>0.0007, 0.76</b>     | <b>-0.03, 0.44</b>                   | <b>0.042, 0.06</b>                                            | <b>-0.013, 0.59</b>                                                                               |
| Current                                 | <b>0.013, &lt;0.001</b> | <b>-0.30, &lt;0.001</b>              | <b>0.062, 0.03</b>                                            | <b>-0.087, 0.004</b>                                                                              |
| Pack-years of smoking<br>(ever smokers) | <b>-0.001, 0.008</b>    | <b>-0.015, 0.03</b>                  | 0.35                                                          | <b>-0.008, 0.03</b>                                                                               |
| Time since quitting                     | 0.75                    | 0.60                                 | 0.57                                                          | 0.59                                                                                              |
| Intensity of smoking                    | 0.11                    | <b>-0.105, 0.04</b>                  | 0.57                                                          | 0.47                                                                                              |
| <b>cIMT</b>                             |                         |                                      |                                                               |                                                                                                   |
| Former                                  | <b>0.001, 0.006</b>     | <b>-0.014 (0.02)</b>                 | <b>0.003, 0.43</b>                                            | <b>-0.007, 0.04</b>                                                                               |
| Current                                 | <b>0.002, 0.001</b>     | <b>-0.024 (0.003)</b>                | <b>0.010, 0.02</b>                                            | <b>-0.009, 0.06</b>                                                                               |
| Pack-years of smoking<br>(ever smokers) | 0.11                    | <b>-0.003, 0.03</b>                  | 0.91                                                          | <b>-0.002, &lt;0.001</b>                                                                          |
| Time since quitting                     | 0.29                    | 0.82                                 | 0.20                                                          | 0.22                                                                                              |
| Intensity of smoking                    | 0.14                    | 0.65                                 | 0.27                                                          | 0.44                                                                                              |
| <b>ABI≤1.0</b>                          |                         |                                      |                                                               |                                                                                                   |
| Former                                  | <b>1.04, &lt;0.001</b>  | 0.56                                 | 0.32                                                          | 0.22                                                                                              |
| Current                                 | <b>1.06, &lt;0.001</b>  | 0.90                                 | 0.09                                                          | 0.10                                                                                              |
| Pack-years of smoking<br>(ever smokers) | 0.32                    | 0.14                                 | 0.27                                                          | 0.97                                                                                              |
| Time since quitting<br>(former smokers) | 0.09                    | 0.96                                 | 0.16                                                          | 0.97                                                                                              |
| Intensity of smoking                    | 0.07                    | 0.31                                 | 0.16                                                          | 0.49                                                                                              |

---

(current smokers)

**CAC>0**

|                                         |                   |                   |                    |      |
|-----------------------------------------|-------------------|-------------------|--------------------|------|
| Former                                  | 0.47              | <b>1.43, 0.05</b> | 0.82               | 0.91 |
| Current                                 | 0.56              | <b>1.69, 0.02</b> | 0.19               | 0.30 |
| Pack-years of smoking<br>(ever smokers) | 0.69              | 0.63              | 0.63               | 0.86 |
| Time since quitting                     | 0.80              | 0.84              | 0.56               | 0.06 |
| Intensity of smoking                    | <b>1.05, 0.01</b> | 0.83              | <b>1.48, 0.005</b> | 0.92 |

---

ABI indicates ankle-brachial index; CAC, coronary artery calcium; cIMT, carotid intima-media thickness; hsCRP, high-sensitivity C-reactive protein. Bold items are statistically significant interaction terms (P<0.05).

**Table S3. Stratified analyses by age, sex, race and education for ln hsCRP where interaction P-values were < 0.05 by smoking status, burden, years since quitting and intensity**

|                              | <b>Overall</b>      | <b>P-value</b>   | <b>Males</b>               | <b>P-value</b>   | <b>Females</b>       | <b>P-value</b>   |
|------------------------------|---------------------|------------------|----------------------------|------------------|----------------------|------------------|
| <b>Never</b>                 | REF                 |                  | REF                        |                  | REF                  |                  |
| <b>Former</b>                | 0.01 (-0.02 – 0.05) | 0.46             | 0.05 (-0.01 – 0.10)        | 0.13             | -0.01 (-0.06 – 0.05) | 0.82             |
| <b>Current</b>               | 0.24 (0.19 – 0.29)  | <b>&lt;0.001</b> | 0.39 (0.31 – 0.46)         | <b>&lt;0.001</b> | 0.09 (0.01 – 0.16)   | <b>0.02</b>      |
| <b>Pack-years of smoking</b> | 0.02 (0.01 – 0.03)  | <b>&lt;0.001</b> | 0.03 (0.02 – 0.04)         | <b>&lt;0.001</b> | 0.01 (-0.001 – 0.02) | <b>0.07</b>      |
| <b>Smoking intensity</b>     | 0.10 (0.05 – 0.15)  | <b>&lt;0.001</b> | 0.13 (0.06 – 0.20)         | <b>&lt;0.001</b> | 0.05 (-0.03 – 0.13)  | 0.27             |
|                              | <b>Overall</b>      | <b>P-value</b>   | <b>Age&lt;50</b>           | <b>P-value</b>   | <b>Age≥50</b>        | <b>P-value</b>   |
| <b>Never</b>                 | REF                 |                  | REF                        |                  | REF                  |                  |
| <b>Former</b>                | 0.01 (-0.02 – 0.05) | 0.46             | -0.01 (-0.08 – 0.05)       | 0.69             | 0.03 (-0.02 – 0.08)  | 0.23             |
| <b>Current</b>               | 0.24 (0.19 – 0.29)  | <b>&lt;0.001</b> | 0.15 (0.06 – 0.23)         | <b>0.001</b>     | 0.31 (0.24 – 0.37)   | <b>&lt;0.001</b> |
| <b>Pack-years of smoking</b> | 0.02 (0.01 – 0.03)  | <b>&lt;0.001</b> | 0.03 (0.02 – 0.05)         | <b>&lt;0.001</b> | 0.02 (0.01 – 0.03)   | <b>&lt;0.001</b> |
|                              | <b>Overall</b>      | <b>P-value</b>   | <b>High school or less</b> | <b>P-value</b>   | <b>College</b>       | <b>P-value</b>   |
| <b>Never</b>                 | REF                 |                  | REF                        |                  | REF                  |                  |
| <b>Former</b>                | 0.01 (-0.02 – 0.05) | 0.46             | 0.01 (-0.05 – 0.07)        | 0.78             | 0.02 (-0.04 – 0.07)  | 0.50             |
| <b>Current</b>               | 0.24 (0.19 – 0.29)  | <b>&lt;0.001</b> | 0.27 (0.20 – 0.34)         | <b>&lt;0.001</b> | 0.18 (0.09 – 0.26)   | <b>&lt;0.001</b> |
| <b>Pack-years of smoking</b> | 0.02 (0.01 – 0.03)  | <b>&lt;0.001</b> | 0.03 (0.02 – 0.04)         | <b>&lt;0.001</b> | 0.01 (-0.00 – 0.02)  | 0.08             |
|                              | <b>Overall</b>      | <b>P-value</b>   | <b>Whites</b>              | <b>P-value</b>   | <b>Non-Whites</b>    | <b>P-value</b>   |
| <b>Never</b>                 | REF                 |                  | REF                        |                  | REF                  |                  |
| <b>Former</b>                | 0.01 (-0.02 – 0.05) | 0.46             | -0.01 (-0.06 – 0.05)       | 0.80             | 0.04 (-0.02 – 0.10)  | 0.24             |

| <b>Current</b> | 0.24 (0.19 – 0.29)  | <b>&lt;0.001</b> | 0.20 (0.13 – 0.28)  | <b>&lt;0.001</b> | 0.28 (0.20 – 0.36)  | <b>&lt;0.001</b> |
|----------------|---------------------|------------------|---------------------|------------------|---------------------|------------------|
|                | <b>Overall</b>      | <b>P-value</b>   | <b>Browns</b>       | <b>P-value</b>   | <b>Non-Browns</b>   | <b>P-value</b>   |
| <b>Never</b>   | REF                 |                  | REF                 |                  | REF                 |                  |
| <b>Former</b>  | 0.01 (-0.02 – 0.05) | 0.46             | 0.02 (-0.06 – 0.09) | 0.68             | 0.01 (-0.03 – 0.06) | 0.58             |
| <b>Current</b> | 0.24 (0.19 – 0.29)  | <b>&lt;0.001</b> | 0.25 (0.15 – 0.36)  | <b>&lt;0.001</b> | 0.24 (0.17 – 0.30)  | <b>&lt;0.001</b> |
|                | <b>Overall</b>      | <b>P-value</b>   | <b>Blacks</b>       | <b>P-value</b>   | <b>Non-Blacks</b>   | <b>P-value</b>   |
| <b>Never</b>   | REF                 |                  | REF                 |                  | REF                 |                  |
| <b>Former</b>  | 0.01 (-0.02 – 0.05) | 0.46             | 0.02 (-0.09 – 0.12) | 0.78             | 0.01 (-0.03 – 0.06) | 0.53             |
| <b>Current</b> | 0.24 (0.19 – 0.29)  | <b>&lt;0.001</b> | 0.24 (0.10 – 0.37)  | <b>0.001</b>     | 0.24 (0.18 – 0.30)  | <b>&lt;0.001</b> |

HsCRP indicates high-sensitivity C-reactive protein.

Bold items are statistically significant interaction terms (P<0.05).

**Table S4. Stratified analyses by age, sex, race and education for cIMT where interaction P-values were < 0.05) by smoking status and burden**

|                              | <b>Overall</b>        | <b>P-value</b> | <b>Males</b>               | <b>P-value</b> | <b>Females</b>         | <b>P-value</b> |
|------------------------------|-----------------------|----------------|----------------------------|----------------|------------------------|----------------|
| <b>Never</b>                 | REF                   |                | REF                        |                | REF                    |                |
| <b>Former</b>                | 0.01 (0.01 – 0.02)    | <0.001         | 0.02 (0.01 – 0.03)         | <0.001         | 0.007 (-0.000 – 0.015) | 0.06           |
| <b>Current</b>               | 0.03 (0.02 – 0.04)    | <0.001         | 0.04 (0.03 – 0.06)         | <0.001         | 0.02 (0.01 – 0.03)     | 0.002          |
| <b>Pack-years of smoking</b> | 0.003 (0.002 – 0.004) | <0.001         | 0.004 (0.003 – 0.006)      | <0.001         | 0.002 (0.000 – 0.003)  | 0.03           |
|                              | <b>Overall</b>        | <b>P-value</b> | <b>Age&lt;50</b>           | <b>P-value</b> | <b>Age≥50</b>          | <b>P-value</b> |
| <b>Never</b>                 | REF                   |                | REF                        |                | REF                    |                |
| <b>Former</b>                | 0.01 (0.01 – 0.02)    | <0.001         | 0.02 (0.01 – 0.02)         | <0.001         | 0.02 (0.01 – 0.03)     | <0.001         |
| <b>Current</b>               | 0.03 (0.02 – 0.04)    | <0.001         | 0.03 (0.02 – 0.04)         | <0.001         | 0.03 (0.01 – 0.04)     | <0.001         |
|                              | <b>Overall</b>        | <b>P-value</b> | <b>High school or less</b> | <b>P-value</b> | <b>College</b>         | <b>P-value</b> |
| <b>Never</b>                 | REF                   |                | REF                        |                | REF                    |                |
| <b>Former</b>                | 0.01 (0.01 – 0.02)    | <0.001         | 0.02 (0.01 – 0.03)         | 0.002          | 0.01 (0.00 – 0.02)     | 0.003          |
| <b>Current</b>               | 0.03 (0.02 – 0.04)    | <0.001         | 0.03 (0.02 – 0.05)         | <0.001         | 0.02 (0.01 – 0.03)     | <0.001         |
| <b>Pack-years of smoking</b> | 0.003 (0.002 – 0.004) | <0.001         | 0.005 (0.004 – 0.007)      | <0.001         | 0.001 (-0.001 – 0.003) | 0.27           |
|                              | <b>Overall</b>        | <b>P-value</b> | <b>Whites</b>              | <b>P-value</b> | <b>Non-Whites</b>      | <b>P-value</b> |
| <b>Never</b>                 | REF                   |                | REF                        |                | REF                    |                |
| <b>Former</b>                | 0.01 (0.01 – 0.02)    | <0.001         | 0.01 (0.00 – 0.02)         | 0.03           | 0.02 (0.01 – 0.03)     | 0.001          |
| <b>Current</b>               | 0.03 (0.02 – 0.04)    | <0.001         | 0.02 (0.01 – 0.03)         | 0.003          | 0.04 (0.03 – 0.05)     | <0.001         |
|                              | <b>Overall</b>        | <b>P-value</b> | <b>Browns</b>              | <b>P-value</b> | <b>Non-Browns</b>      | <b>P-value</b> |

---

|                |                    |                |                     |                |                    |                |
|----------------|--------------------|----------------|---------------------|----------------|--------------------|----------------|
| <b>Never</b>   | REF                |                | REF                 |                | REF                |                |
| <b>Former</b>  | 0.01 (0.01 – 0.02) | <0.001         | 0.02 (0.01 – 0.03)  | 0.001          | 0.01 (0.00 – 0.02) | 0.01           |
| <b>Current</b> | 0.03 (0.02 – 0.04) | <0.001         | 0.04 (0.02 – 0.06)  | <0.001         | 0.02 (0.01 – 0.03) | <0.001         |
|                | <b>Overall</b>     | <b>P-value</b> | <b>Blacks</b>       | <b>P-value</b> | <b>Non-Blacks</b>  | <b>P-value</b> |
| <b>Never</b>   | REF                |                | REF                 |                | REF                |                |
| <b>Former</b>  | 0.01 (0.01 – 0.02) | <0.001         | 0.01 (-0.01 – 0.03) | 0.31           | 0.01 (0.01 – 0.02) | <0.001         |
| <b>Current</b> | 0.03 (0.02 – 0.04) | <0.001         | 0.04 (0.02 – 0.06)  | 0.001          | 0.02 (0.02 – 0.03) | <0.001         |

---

HsCRP indicates high-sensitivity C-reactive protein.  
 Bold items are statistically significant interaction terms (P<0.05).



**Table S5. Stratified analyses by hsCRP levels for CAC > 0 outcome (P-interaction > 0.05) by smoking status, burden, years since quitting and intensity**

|                                  | Overall            | P-value          | hsCRP $\geq$ 2     | P-value<br>CAC>0 | hsCRP<2            | P-value          |
|----------------------------------|--------------------|------------------|--------------------|------------------|--------------------|------------------|
| <b>Never</b>                     | REF                |                  | REF                |                  | REF                |                  |
| <b>Former</b>                    | 1.12 (0.93 – 1.35) | 0.22             | 1.35 (1.00 – 1.83) | <b>&lt;0.05</b>  | 0.97 (0.76 – 1.23) | 0.80             |
| <b>Current</b>                   | 1.83 (1.46 – 2.30) | <b>&lt;0.001</b> | 1.87 (1.31 – 2.67) | <b>0.001</b>     | 1.82 (1.34 – 2.47) | <b>&lt;0.001</b> |
| <b>Pack-years<br/>of smoking</b> | 1.11 (1.07 – 1.14) | <b>&lt;0.001</b> | 1.11 (1.06 – 1.16) | <b>&lt;0.001</b> | 1.10 (1.05 – 1.15) | <b>&lt;0.001</b> |
| <b>Years since<br/>quitting</b>  | 0.87 (0.81 – 0.93) | <b>&lt;0.001</b> | 0.85 (0.76 – 0.95) | <b>&lt;0.01</b>  | 0.86 (0.78 – 0.95) | <b>0.003</b>     |
| <b>Smoking<br/>intensity</b>     | 1.26 (1.02 – 1.56) | <b>0.033</b>     | 1.45 (1.02 – 2.05) | <b>0.04</b>      | 1.21 (0.89 – 1.63) | 0.22             |

CAC indicates coronary artery calcium; hsCRP, high-sensitivity C-reactive protein.  
 Bold items are statistically significant interaction terms (P<0.05).

**Table S6. Baseline mean absolute difference (95% CI) in levels of biomarkers of cardiovascular injury (hsCRP) and cIMT, and odds ratios (OR) for measures of subclinical atherosclerosis (ABI<1.0 and CAC>0) by second-hand smoking status**

| Exposure | Ln hsCRP (mg/L)            |                  | cIMT (mm)                  |                 | ABI < 1.0             |         | CAC (Agatston)* > 0   |         |
|----------|----------------------------|------------------|----------------------------|-----------------|-----------------------|---------|-----------------------|---------|
|          | $\beta$ -coeff<br>(95% CI) | P-trend          | $\beta$ -coeff<br>(95% CI) | P-trend         | OR (95% CI)           | P-trend | OR (95% CI)           | P-trend |
| Model 2  |                            |                  |                            |                 |                       |         |                       |         |
| 0        | REF                        | <b>&lt;0.001</b> | REF                        | <b>&lt;0.01</b> | REF                   | 0.51    | REF                   | 0.09    |
| 1        | 0.05<br>(0.01 – 0.09)      |                  | 0.01<br>(-0.00 – 0.02)     |                 | 1.13<br>(0.94 – 1.36) |         | 0.95<br>(0.78 – 1.16) |         |
| 2        | 0.10<br>(0.03 – 0.17)      |                  | 0.01<br>(0.00 – 0.03)      |                 | 1.15<br>(0.85 – 1.55) |         | 1.37<br>(1.03 – 1.84) |         |
| 3        | 0.15<br>(-0.01 – 0.30)     |                  | 0.02<br>(-0.01 – 0.05)     |                 | 0.56<br>(0.23 – 1.38) |         | 0.96<br>(0.52 – 1.77) |         |
| Model 3  |                            |                  |                            |                 |                       |         |                       |         |
| 0        | REF                        | <b>0.03</b>      | REF                        | 0.09            | REF                   | 0.44    | REF                   | 0.925   |
| 1        | 0.04<br>(-0.00 – 0.08)     |                  | 0.01<br>(-0.00 – 0.01)     |                 | 1.06<br>(0.88 – 1.28) |         | 0.92<br>(0.75 – 1.12) |         |
| 2        | 0.05<br>(-0.02 – 0.13)     |                  | 0.01<br>(-0.01 – 0.02)     |                 | 0.95<br>(0.71 – 1.30) |         | 1.22<br>(0.91 – 1.64) |         |
| 3        | 0.07<br>(-0.09 – 0.23)     |                  | 0.01<br>(-0.02 – 0.04)     |                 | 0.42<br>(0.17 – 1.03) |         | 0.76<br>(0.41 – 1.41) |         |

Model 1 is adjusted for age, sex, race, education (results are not shown)

Model 2 is adjusted for Model 1 plus study site, family history of MI, body mass index, systolic blood pressure, LDL cholesterol, HDL cholesterol, triglycerides, hypertension status, diabetes mellitus, statin use.

Model 3 is adjusted for Model 2 plus self-reported smoking status (never, former, current).

Second-hand smoke and smoking status for Ln hsCRP

P-interaction (former\*shs) =0.54

P-interaction (current\*shs) =0.82

**Table S7. Baseline relative risk ratios (RRR) with 95% confidence intervals (CI) for categories of coronary artery calcium (CAC) using multinomial logistic regression models among 4,278 participants in ELSA-Brasil**

| Exposure                                                          | CAC (Agatston)<br>= 0 | CAC (Agatston) >0 and ≤100 | CAC (Agatston) >100 and ≤400 | CAC (Agatston) >400 |
|-------------------------------------------------------------------|-----------------------|----------------------------|------------------------------|---------------------|
|                                                                   | OR<br>(95% CI)        | RRR<br>(95% CI)            | P-value                      | RRR<br>(95% CI)     |
| <b>Smoking burden (pack-years of smoking per 5-unit increase)</b> |                       |                            |                              |                     |
| Ever smokers*                                                     | REF                   | 1.09<br>(1.05-1.12)        | <0.001                       | 1.13<br>(1.08-1.18) |
| Former smokers                                                    | REF                   | 1.08<br>(1.04-1.31)        | <0.001                       | 1.12<br>(1.05-1.18) |
| Current smokers                                                   | REF                   | 1.06<br>(1.00-1.13)        | 0.062                        | 1.13<br>(1.03-1.23) |
| <b>Years since quitting smoking among former smokers</b>          |                       |                            |                              |                     |
| Per 5-year increase                                               | REF                   | 0.86<br>(0.80-0.93)        | <0.001                       | 0.92<br>(0.81-1.03) |
| <b>Smoking intensity among current smokers†</b>                   |                       |                            |                              |                     |
| Per 10 cigarettes/day increase                                    | REF                   | 1.15<br>(0.91-1.46)        | 0.236                        | 1.60<br>(1.15-2.21) |

This was a complete case analysis. Models were adjusted for age, sex, race, education, study site, alcohol use, family history of myocardial infarction, body mass index, systolic blood pressure, low-density lipoprotein cholesterol, high-density lipoprotein cholesterol, triglycerides, hypertension status, diabetes mellitus, statin use.

\*Includes both former and current smokers

†Also adjusted for duration of smoking in year
